# Supplementary material
Source: PubMed Central journal article supplement (PMC4340320)
Supplement: supp_D050120_jlr.D050120-1.pdf [file supp_D050120_jlr.D050120-1.pdf]

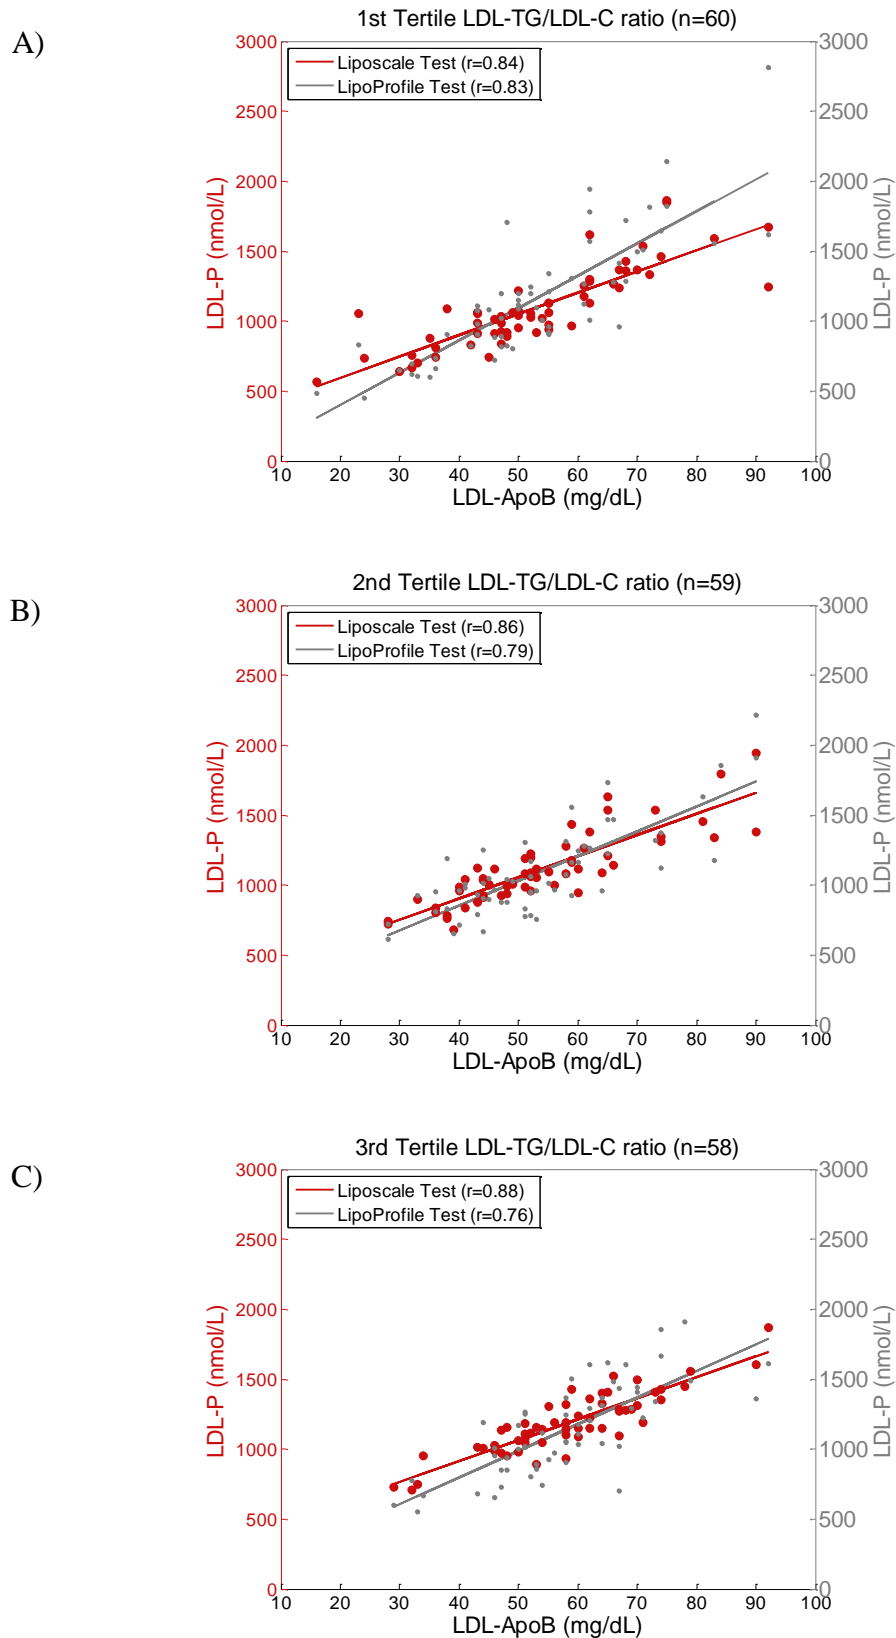

**Figure 1.** The plasma concentration of LDL-ApoB plotted against the plasma concentration of LDL-P across tertiles of the LDL-TG to LDL-C ratio: A) 1st tertile, B) 2nd tertile, and C) 3rd tertile.
