# Supplementary material
Source: PubMed Central journal article supplement (PMC4340320)
Supplement: supp_D050120_jlr.D050120-2.pdf [file supp_D050120_jlr.D050120-2.pdf]

**Table 1.** Within-assay precision based on the analyses of the 5 aliquots of the two subjects in the same day.

|                  |               | Subject 1 |      |        | Subject 2 |      |        |
|------------------|---------------|-----------|------|--------|-----------|------|--------|
|                  |               | Mean      | SD   | CV (%) | Mean      | SD   | CV (%) |
| Lipids (mg/dL)   | VLDL-C        | 2,7       | 0,8  | 28,3   | 0,0       | 0,0  | n.a.   |
|                  | VLDL-TG       | 22,7      | 0,7  | 3,3    | 16,8      | 0,6  | 3,3    |
|                  | LDL-C         | 116,5     | 5,0  | 4,3    | 104,7     | 2,7  | 2,5    |
|                  | LDL-TG        | 14,7      | 0,6  | 4,2    | 10,0      | 0,1  | 1,4    |
|                  | HDL-C         | 71,0      | 1,4  | 2,0    | 49,2      | 1,0  | 2,0    |
|                  | HDL-TG        | 12,4      | 0,3  | 2,2    | 5,3       | 0,1  | 2,1    |
| Particle Number* | VLDL-P        | 13,6      | 0,6  | 4,5    | 9,2       | 0,4  | 3,9    |
|                  | Large VLDL-P  | 0,5       | 0,0  | 6,0    | 0,2       | 0,0  | 6,5    |
|                  | Medium VLDL-P | 2,2       | 0,0  | 2,2    | 1,6       | 0,1  | 4,2    |
|                  | Small VLDL-P  | 11,0      | 0,6  | 5,3    | 7,3       | 0,3  | 4,5    |
|                  | LDL-P         | 779,8     | 34,0 | 4,4    | 691,4     | 17,1 | 2,5    |
|                  | Large LDL-P   | 127,3     | 5,3  | 4,2    | 114,7     | 3,8  | 3,3    |
|                  | Medium LDL-P  | 320,2     | 12,4 | 3,9    | 261,1     | 5,7  | 2,2    |
|                  | Small LDL-P   | 332,3     | 19,1 | 5,8    | 315,6     | 12,6 | 4,0    |
|                  | HDL-P         | 23,4      | 0,7  | 2,9    | 18,9      | 0,3  | 1,7    |
|                  | Large HDL-P   | 3,7       | 0,1  | 1,6    | 2,0       | 0,1  | 6,0    |
|                  | Medium HDL-P  | 8,4       | 0,2  | 2,8    | 4,7       | 0,2  | 4,7    |
|                  | Small HDL-P   | 11,3      | 0,7  | 5,9    | 12,2      | 0,5  | 4,0    |
| Size (nm)        | VLDL          | 42,9      | 0,1  | 0,3    | 42,8      | 0,1  | 0,3    |
|                  | LDL           | 21,5      | 0,0  | 0,2    | 21,4      | 0,0  | 0,2    |
|                  | HDL           | 8,8       | 0,0  | 0,3    | 8,5       | 0,0  | 0,4    |

\*VLDL/LDL: nmol/L; HDL:  $\mu$ mol/L; n.a.: not available
