# Supplementary material
Source: PubMed Central journal article supplement (PMC4340320)
Supplement: supp_D050120_jlr.D050120-3.pdf [file supp_D050120_jlr.D050120-3.pdf]

**Table 2.** Inter-assay precision based on the analyses of 5 aliquots of two different subjects for 3 days.

|                  |               | Subject 1 |      |        | Subject 2 |      |        |
|------------------|---------------|-----------|------|--------|-----------|------|--------|
|                  |               | Mean      | SD   | CV (%) | Mean      | SD   | CV (%) |
| Lipids (mg/dL)   | VLDL-C        | 2,9       | 0,6  | 20,7   | 0,1       | 0,1  | n.a.   |
|                  | VLDL-TG       | 23,2      | 1,4  | 6,0    | 17,0      | 0,7  | 4,1    |
|                  | LDL-C         | 119,3     | 8,0  | 6,7    | 104,5     | 6,4  | 6,1    |
|                  | LDL-TG        | 14,7      | 0,7  | 4,9    | 10,0      | 0,7  | 6,6    |
|                  | HDL-C         | 71        | 1,4  | 1,9    | 49,5      | 1,1  | 2,2    |
|                  | HDL-TG        | 12,4      | 0,3  | 2,1    | 5,3       | 0,1  | 2,8    |
| Particle Number* | VLDL-P        | 14,1      | 0,8  | 5,7    | 9,4       | 0,4  | 4,7    |
|                  | Large VLDL-P  | 0,5       | 0,0  | 6,0    | 0,2       | 0,0  | 10,2   |
|                  | Medium VLDL-P | 2,2       | 0,2  | 8,0    | 1,6       | 0,1  | 5,9    |
|                  | Small VLDL-P  | 11,3      | 0,6  | 5,7    | 7,5       | 0,4  | 5,4    |
|                  | LDL-P         | 796,5     | 48,1 | 6,0    | 690,7     | 39,6 | 5,7    |
|                  | Large LDL-P   | 130,9     | 10,2 | 7,8    | 115,6     | 8,3  | 7,2    |
|                  | Medium LDL-P  | 324,3     | 20,1 | 6,2    | 257,2     | 16,7 | 6,5    |
|                  | Small LDL-P   | 341,3     | 26,0 | 7,6    | 317,9     | 20,8 | 6,5    |
|                  | HDL-P         | 23        | 1,1  | 4,9    | 19,1      | 0,9  | 4,8    |
|                  | Large HDL-P   | 3,8       | 0,2  | 4,8    | 2,0       | 0,1  | 5,8    |
|                  | Medium HDL-P  | 8,4       | 0,3  | 3,7    | 4,6       | 0,3  | 5,9    |
|                  | Small HDL-P   | 10,8      | 1,4  | 12,5   | 12,4      | 1,1  | 9,2    |
| Size (nm)        | VLDL          | 42,9      | 0,1  | 0,3    | 42,6      | 0,2  | 0,4    |
|                  | LDL           | 21,5      | 0,1  | 0,4    | 21,4      | 0,1  | 0,4    |
|                  | HDL           | 8,9       | 0,1  | 0,8    | 8,5       | 0,1  | 0,6    |

\*VLDL/LDL: nmol/L; HDL:  $\mu$ mol/L; n.a.: not available
